# Supplementary material for: Regulating the stemness of mesenchymal stem cells by tuning micropattern features
Source: Royal Society of Chemistry journal article supplement (doi:10.1039/c5tb02215k), 2015-11-12
Supplement: c5tb02215k1.pdf [file c5tb02215k1.pdf]

## Appendix A. Supplementary data

# Regulating Stemness of Mesenchymal Stem Cells by Tuning Micropattern Features

Xinlong Wang<sup>a, b</sup>, Tomoko Nakamoto<sup>a</sup>, Ida Dulińska-Molak<sup>a</sup>, Naoki Kawazoe<sup>a</sup> and Guoping Chen<sup>a, b\*</sup>

<sup>a</sup>Tissue Regeneration Materials Unit, International Center for Materials Nanoarchitectonics, National Institute for Materials Science, 1-1 Namiki, Tsukuba, Ibaraki 305-0044, Japan.

<sup>b</sup>Graduate School of Pure and Applied Sciences, University of Tsukuba, 1-1-1 Tennodai, Tsukuba, Ibaraki 305-8571, Japan.

Tel: +81 29 860 4496; fax: +81 29 860 4714

E-mail address: [Guoping.Chen@nims.go.jp](mailto:Guoping.Chen@nims.go.jp) (G. Chen)

**Supplementary table S1.** Designed and measured dimensions of the circular micropatterns with various spreading area. Data represents the mean  $\pm$  SD (n=3).

| Designed diameter ( $\mu\text{m}$ ) | Measured diameter ( $\mu\text{m}$ ) | Measured thickness (nm) |
|-------------------------------------|-------------------------------------|-------------------------|
| 20                                  | $19.88 \pm 0.73$                    | $59.66 \pm 0.48$        |
| 40                                  | $40.44 \pm 0.20$                    | $62.92 \pm 0.81$        |
| 60                                  | $60.26 \pm 0.39$                    | $65.40 \pm 0.67$        |
| 80                                  | $80.04 \pm 0.24$                    | $67.98 \pm 0.82$        |

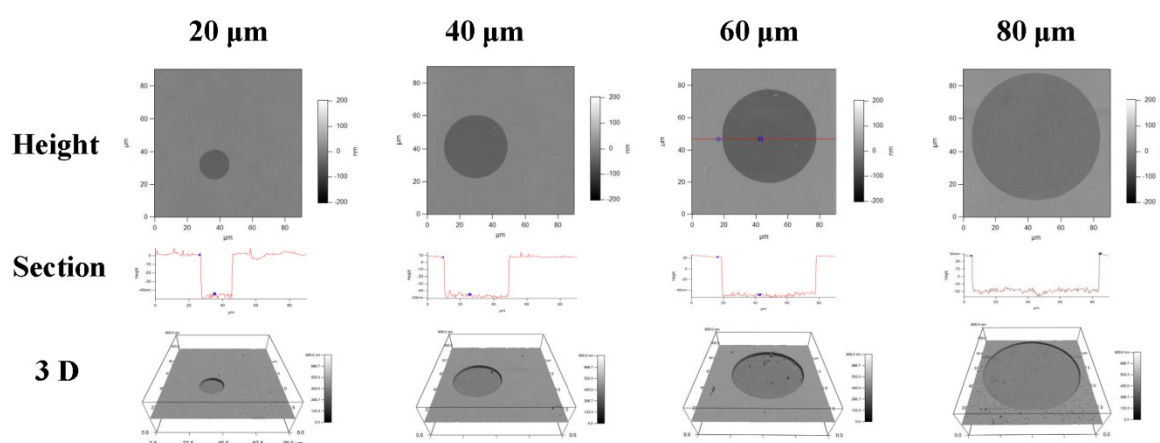

**Supplementary Fig. S1.** Height, section and 3D images of the circular micropatterns with a diameter of 20, 40, 60 and 80  $\mu\text{m}$  measured by AFM in MilliQ water with a contact mode.

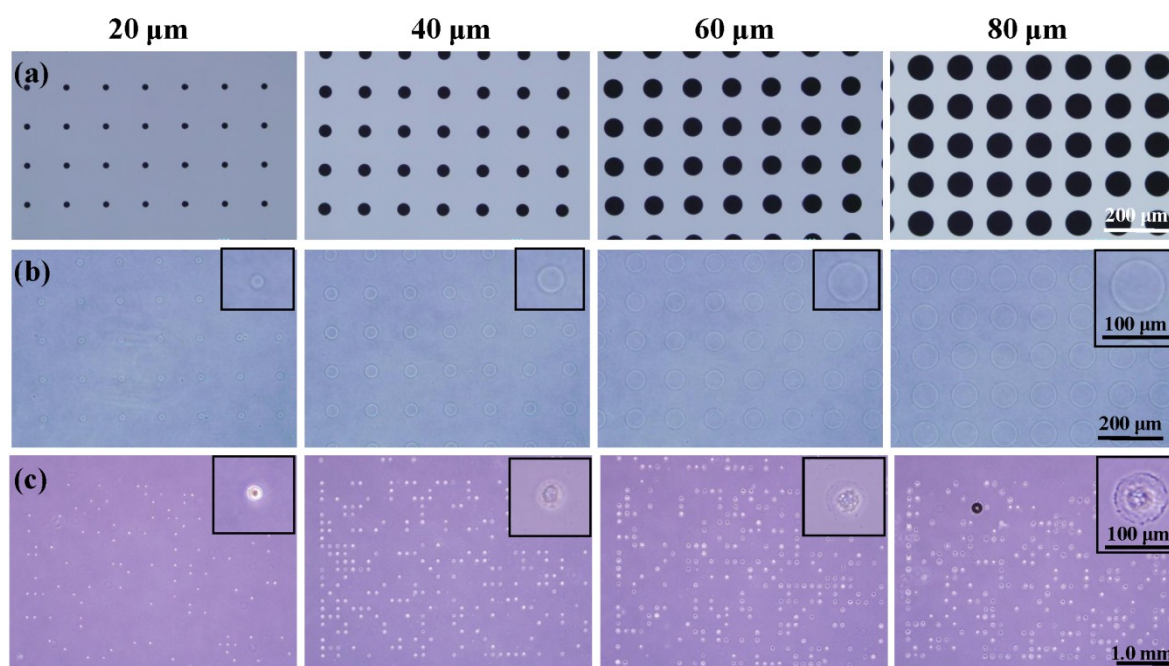

**Supplementary Fig. S2.** Phase-contrast micrographs of the photomasks (a) and micropatterns (b) with various spreading areas. The designed diameters of the circular micropatterns were 20, 40, 60 and 80  $\mu\text{m}$ . The cells were restricted within the micropatterns and exhibited same morphology as the underlying micropatterns with high attachment efficiency (c).

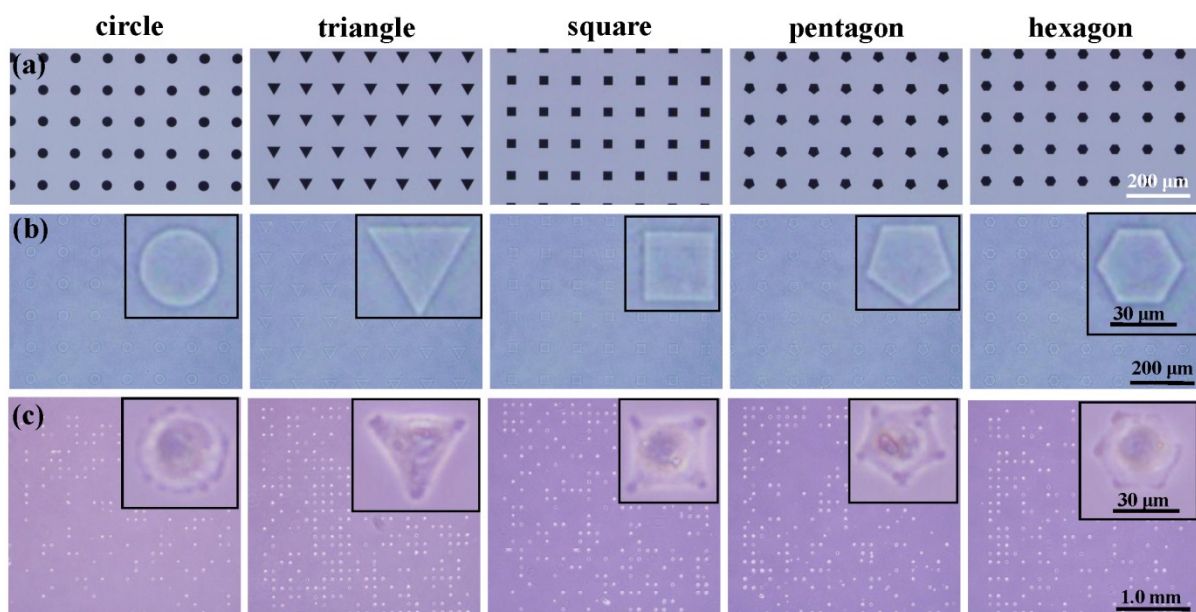

**Supplementary Fig. S3.** Phase-contrast micrographs of the photomasks (a) and micropatterns (b) with various geometries. Round, triangle, square, pentagon and hexagon with the same area of  $1134 \mu\text{m}^2$  were designed. Cells showed the same geometries as the micropatterns they attached (c).

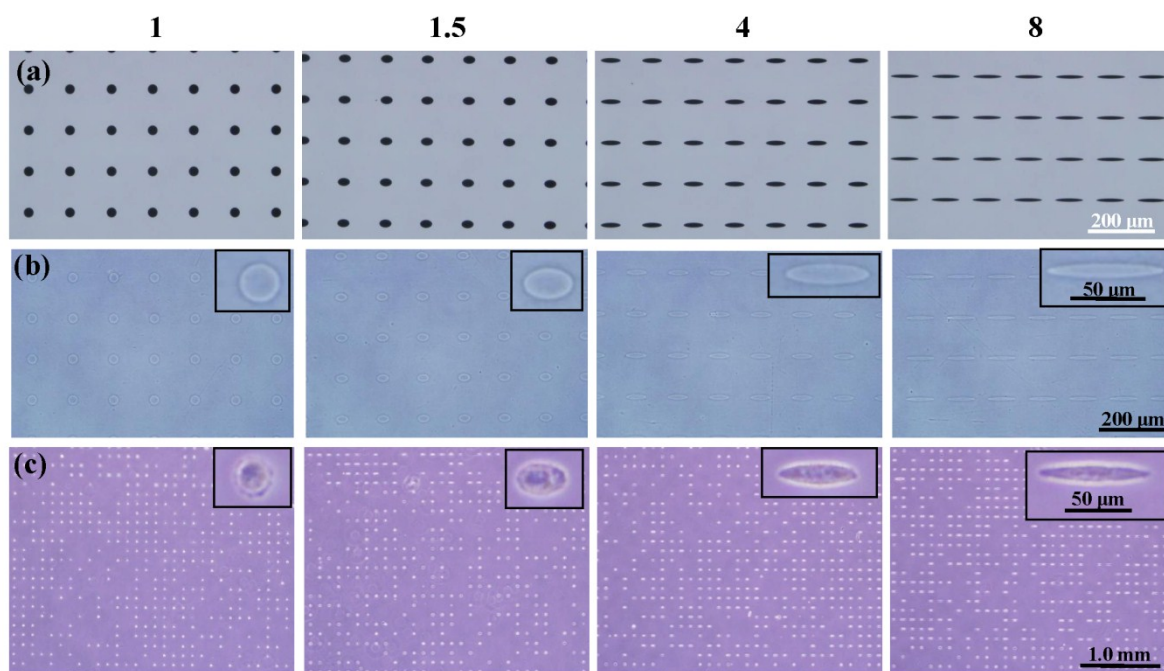

**Supplementary Fig. S4.** Phase-contrast micrographs of the photomasks (a) and micropatterns (b) with the same area of  $706 \mu\text{m}^2$  of different aspect ratios of 1, 1.5, 4 and 8. Cells adhered following the micropatterns (c).

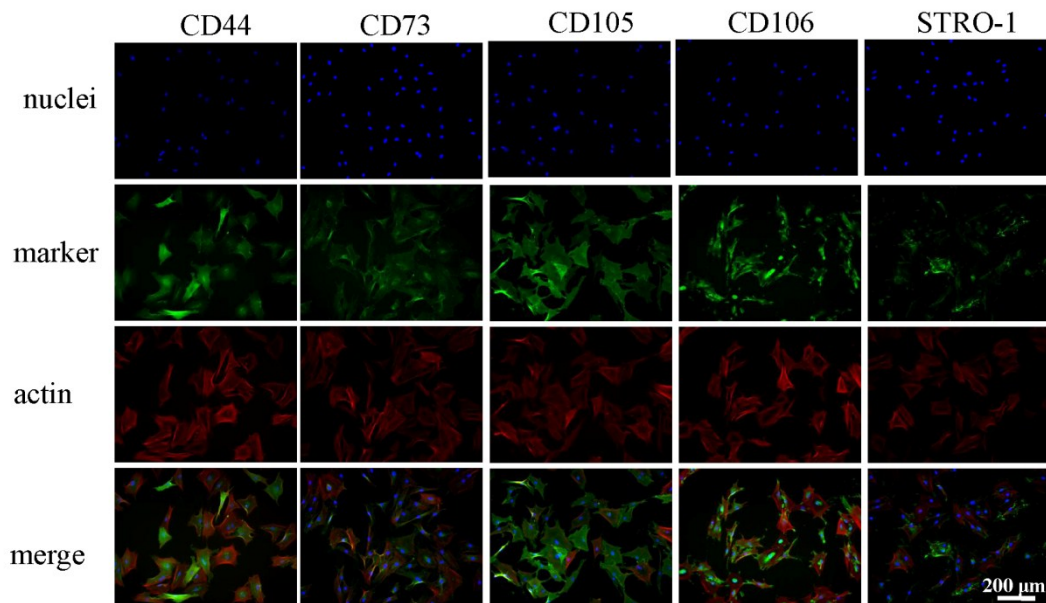

**Supplementary Fig. S5.** Immunofluorescence staining of the positive markers on the purified MSCs after 6 h culture in culture dish. Nuclei (blue), surface markers (green) and F-actin (red) were stained. The purified MSCs were positive for CD44, CD73, CD105, CD106 and STRO-1.

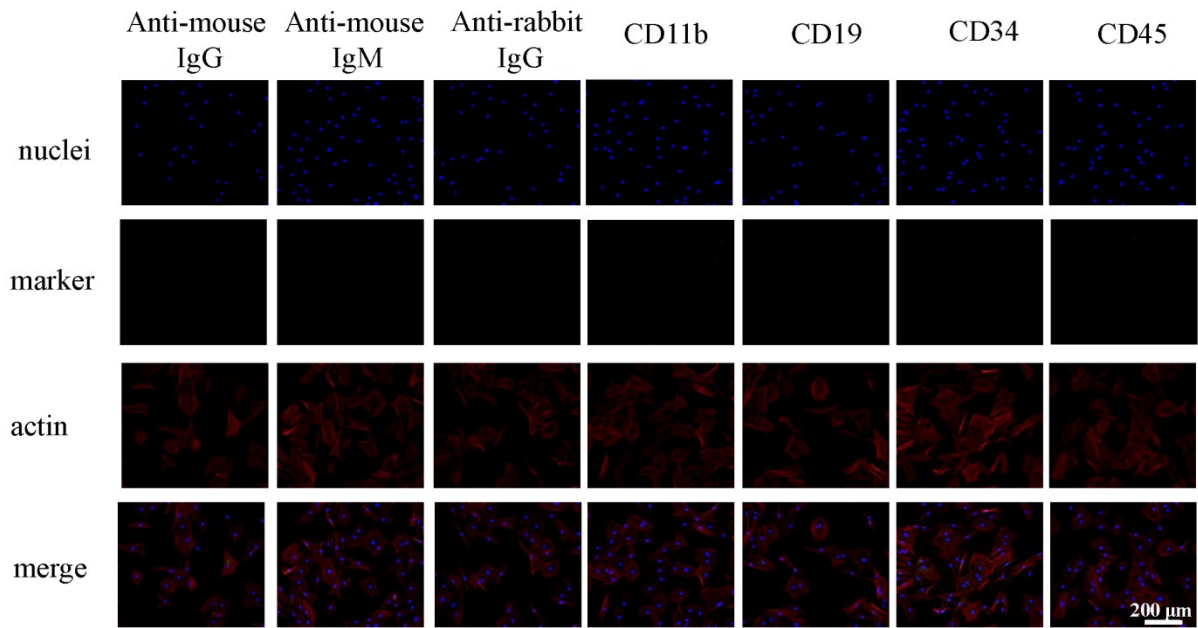

**Supplementary Fig. S6.** Immunofluorescence staining of the negative markers on the purified MSCs after 6 h culture in culture dish. Staining with only second antibodies without primary antibodies were conducted as controls. Nuclei (blue), surface markers (green) and F-actin (red) were stained. The purified MSCs were negative for CD11b, CD19, CD34 and CD45 in accordance with the criteria.
